# Supplementary figures and images for: Scrutinized lipid utilization disrupts Amphotericin-B responsiveness in clinical isolates of Leishmania donovani
Source: eLife journal article supplement (doi:10.7554/elife.102857), 2025-02-07

Figure 3

C ii

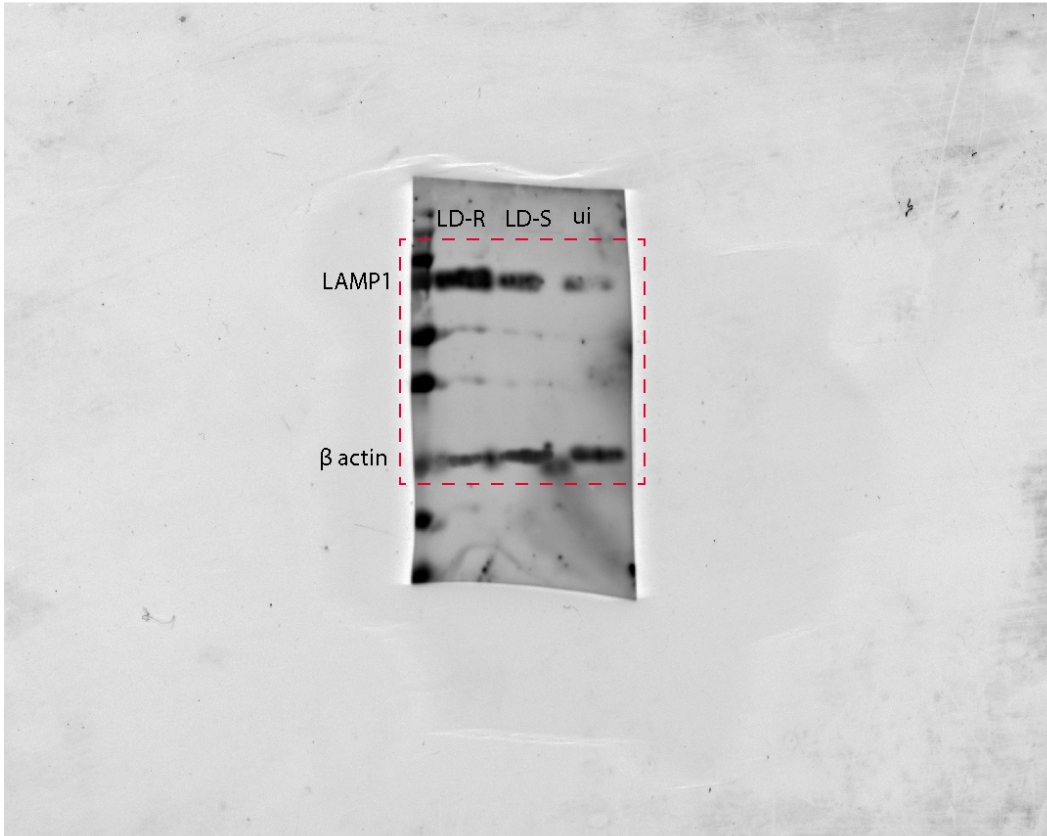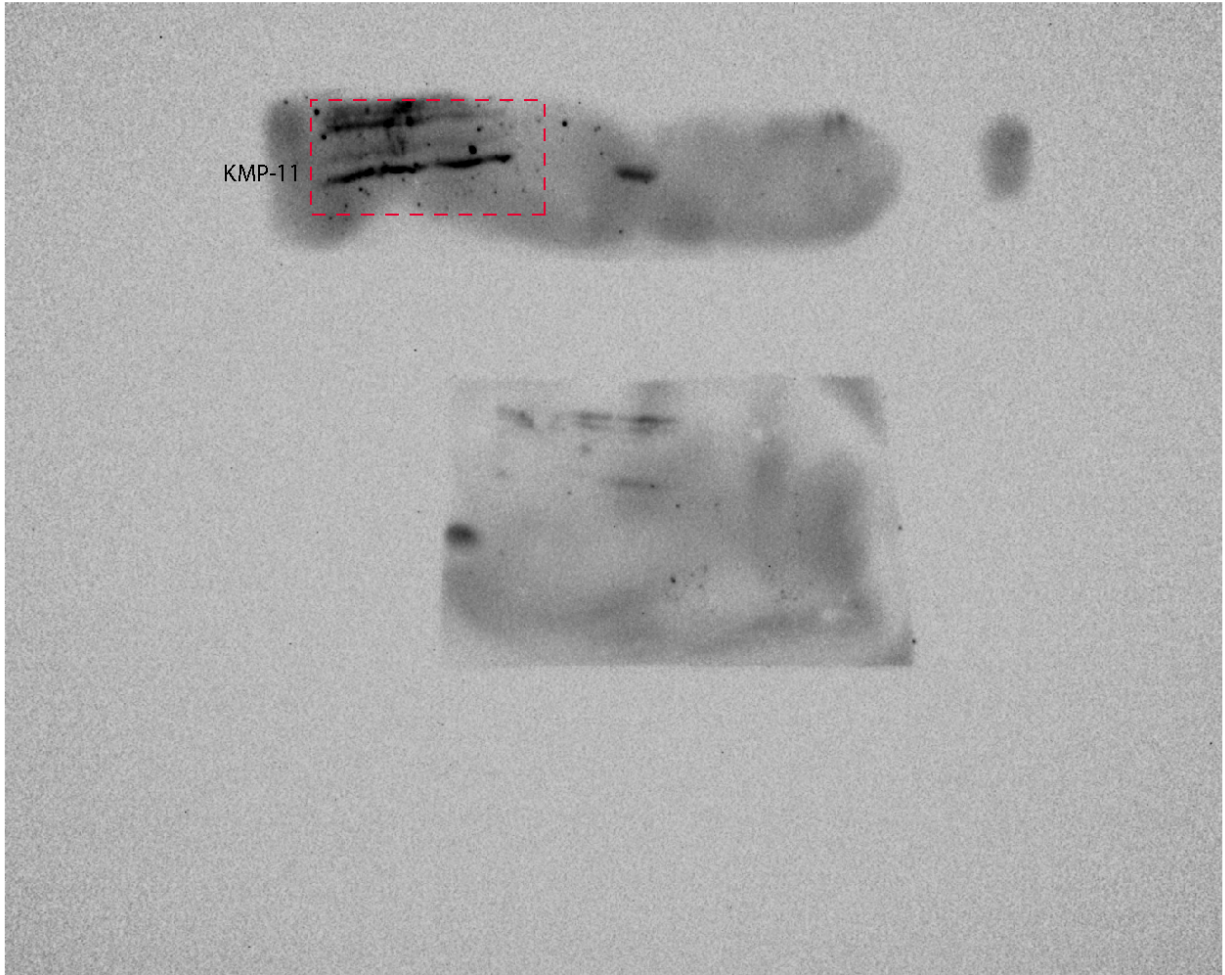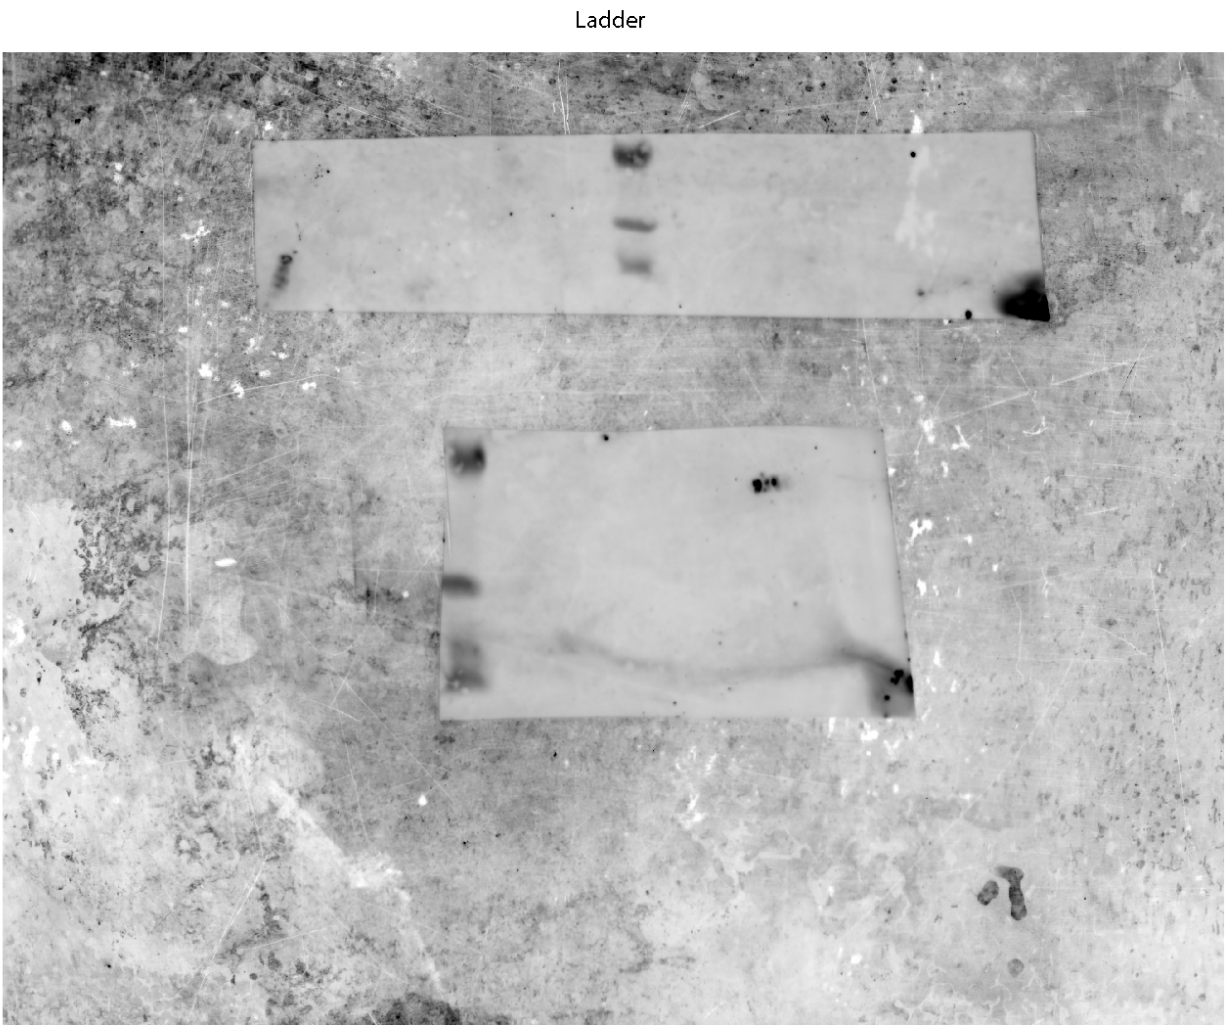

Supplement: fig3-data2 [file elife-102857-fig3-data2-v1.zip]

C iii

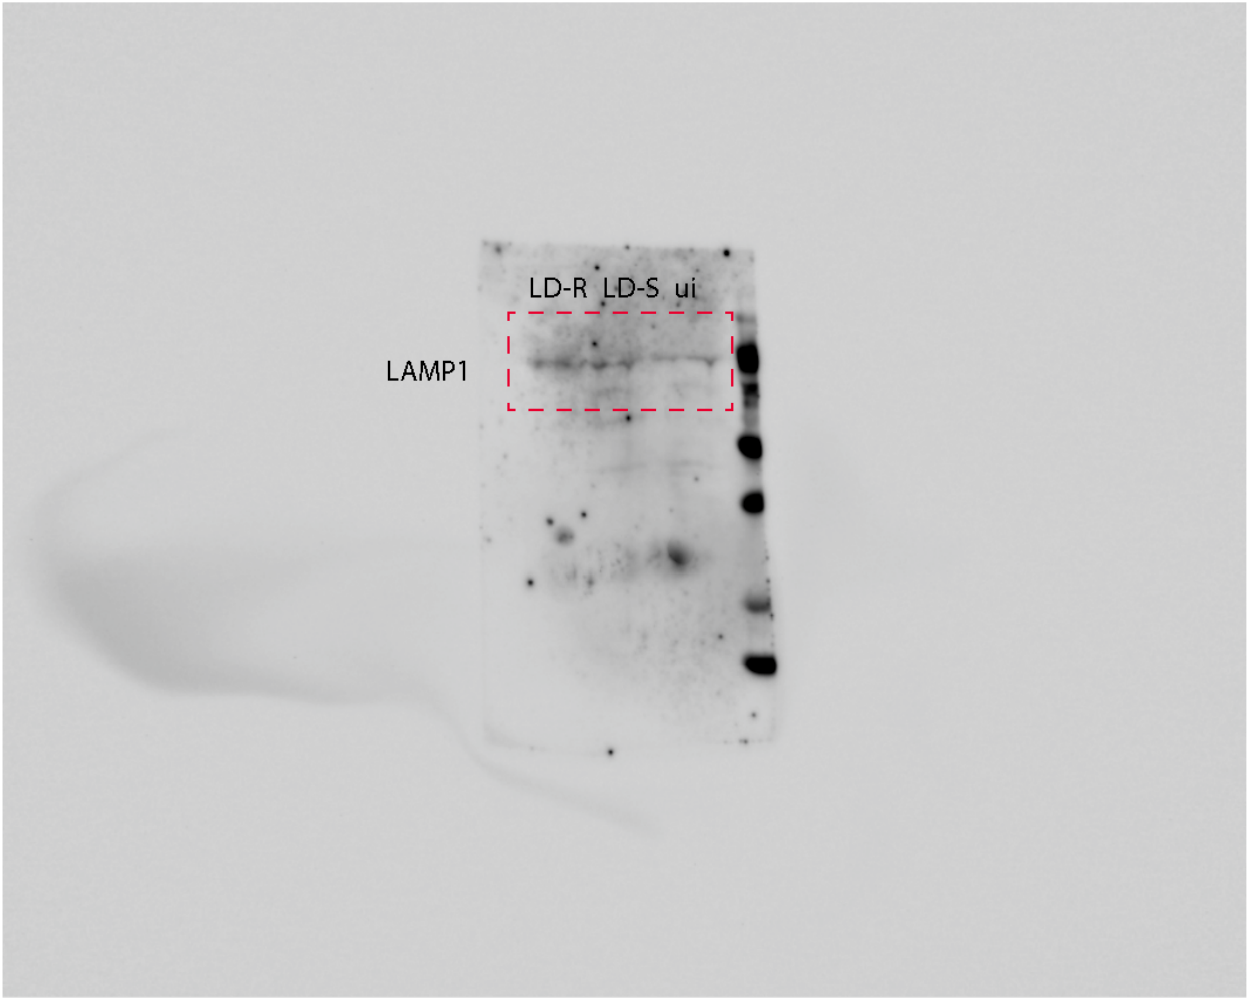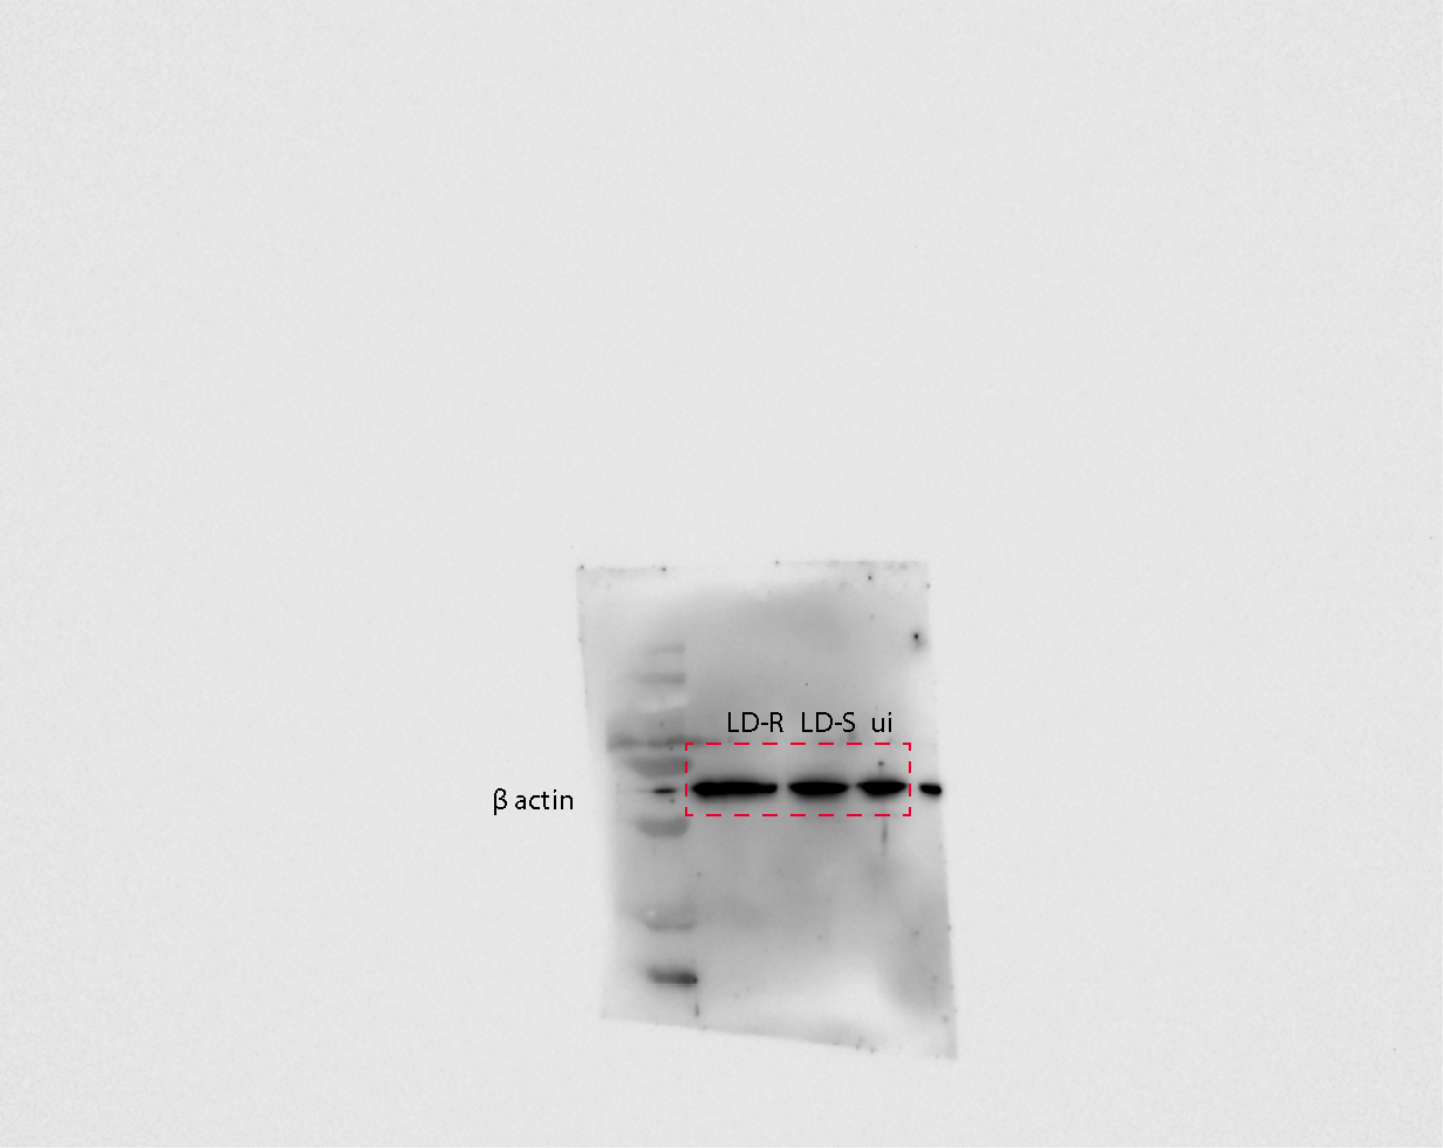

Supplement: fig3-data2 [file elife-102857-fig3-data2-v1.zip]

Figure 4

B i

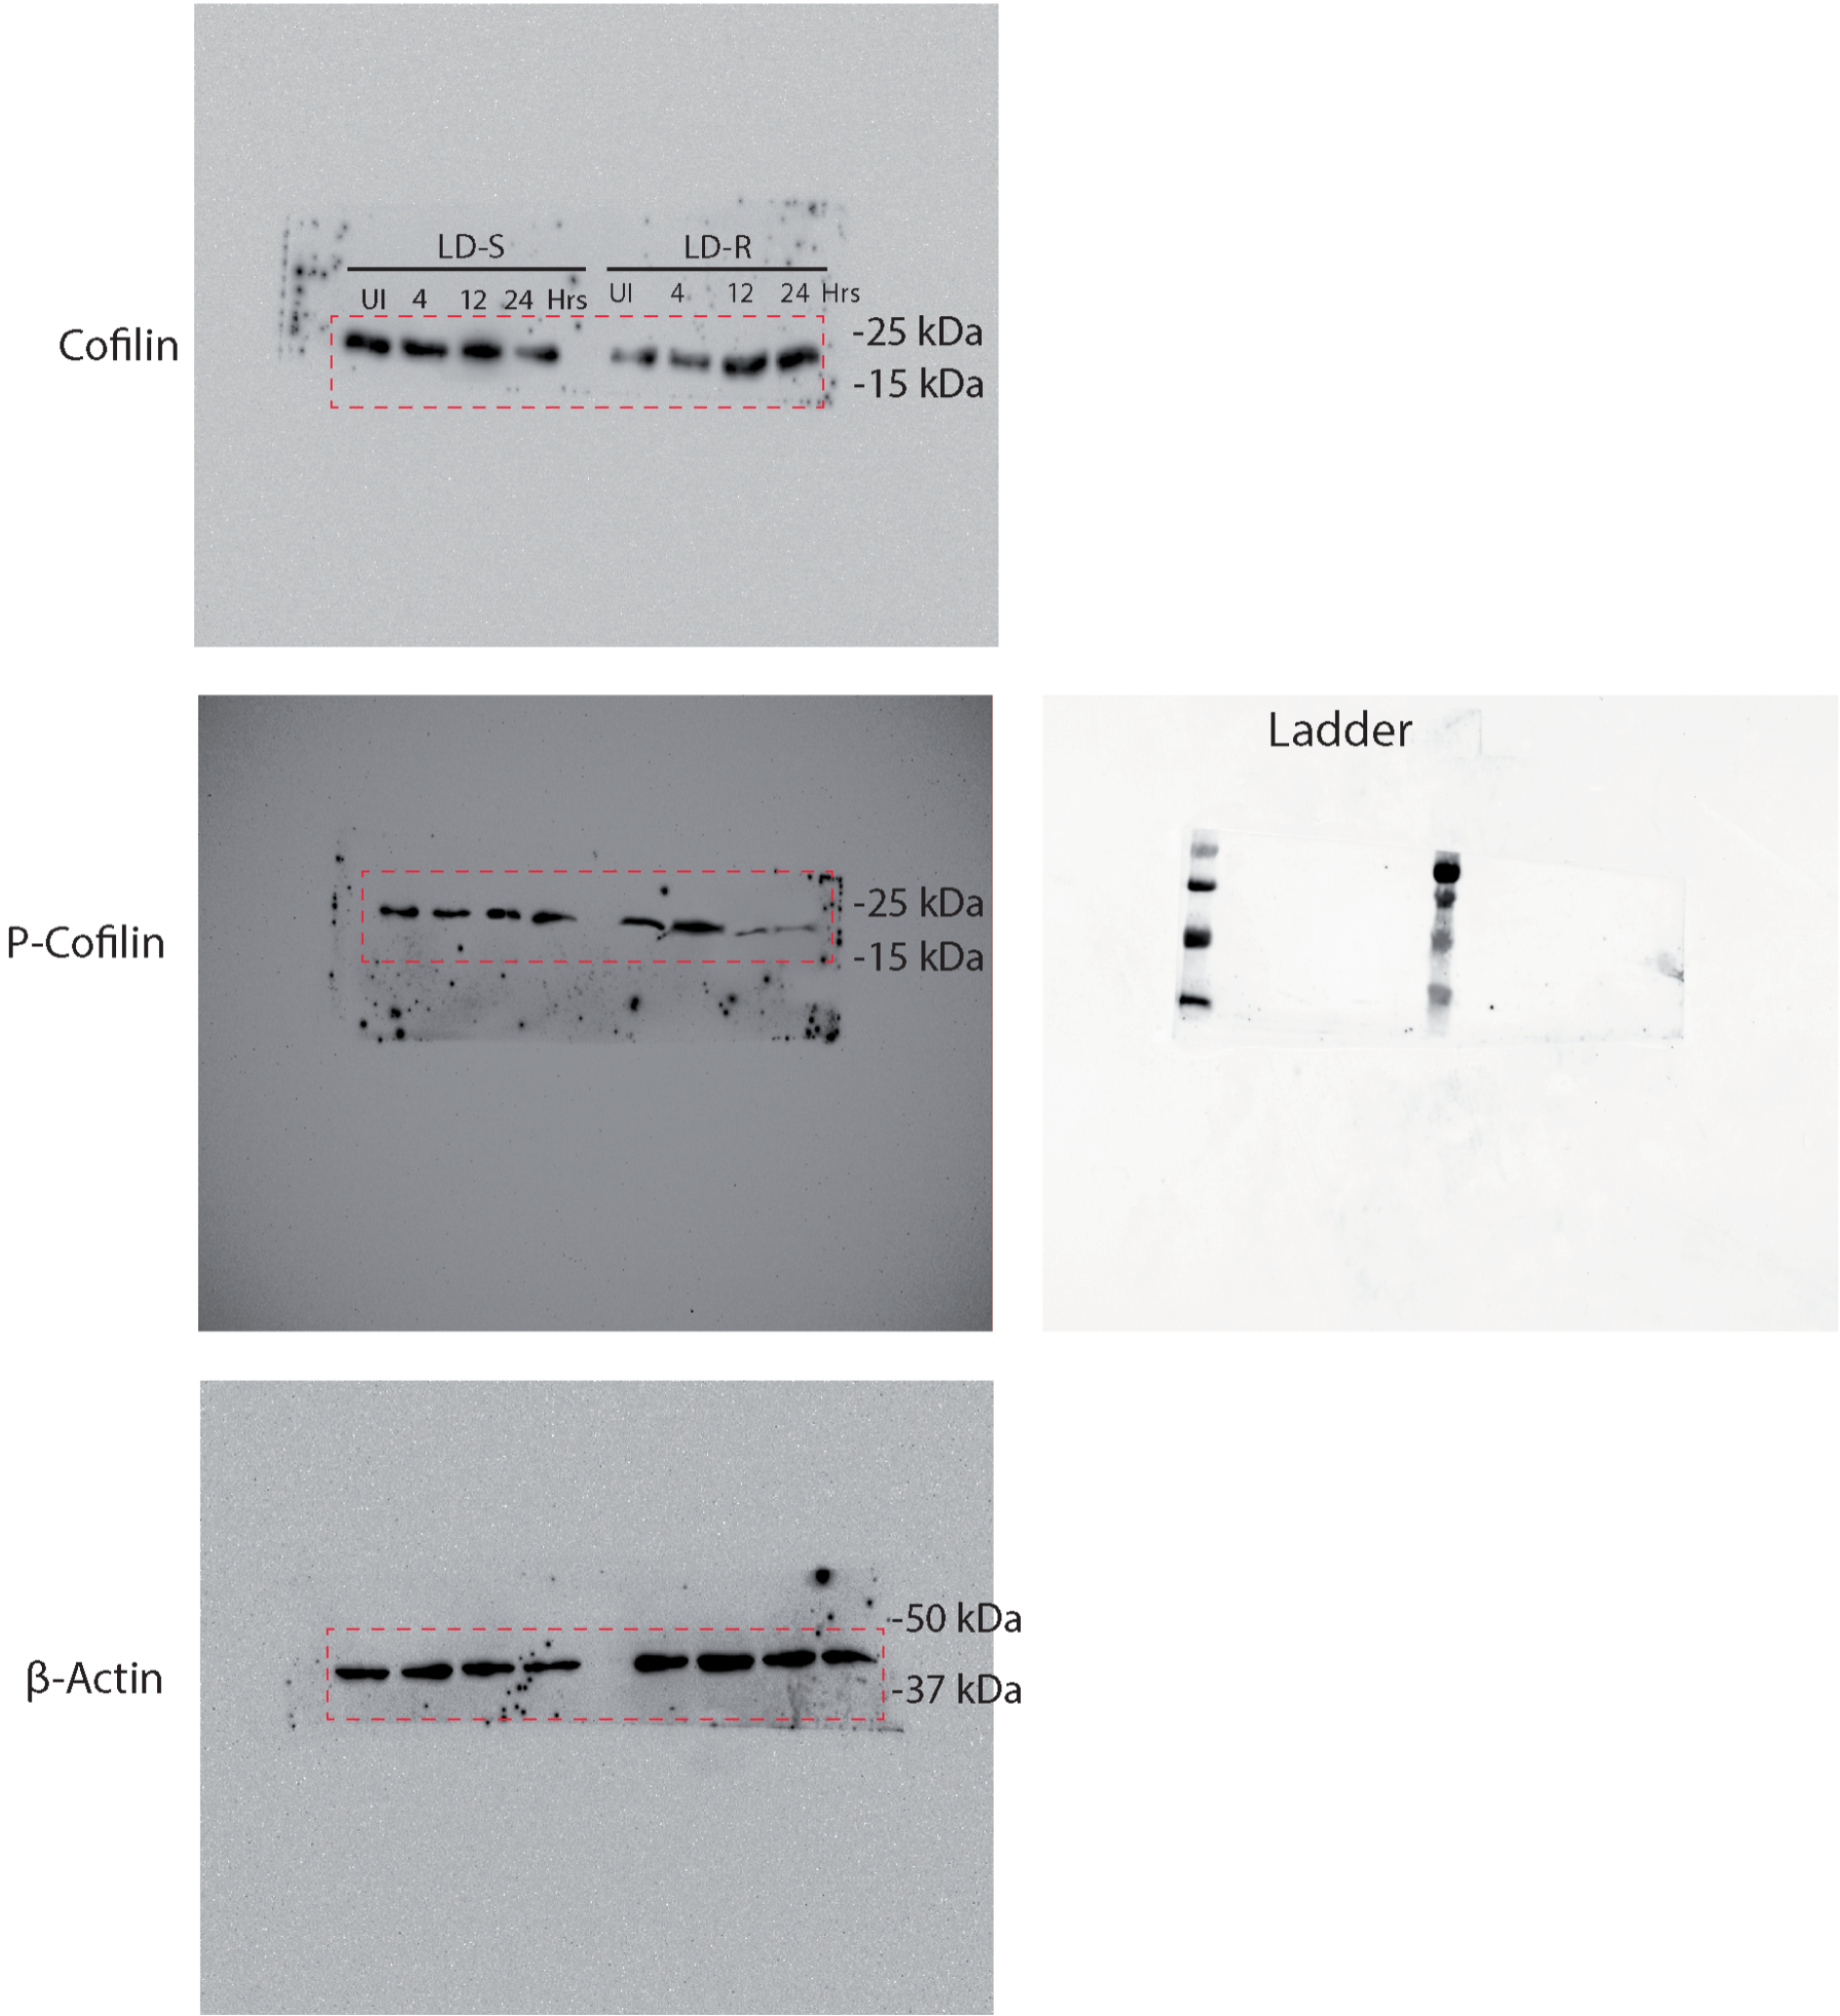

Supplement: fig4-data2 [file elife-102857-fig4-data2-v1.zip]

Figure 4-Figure Supplement 1

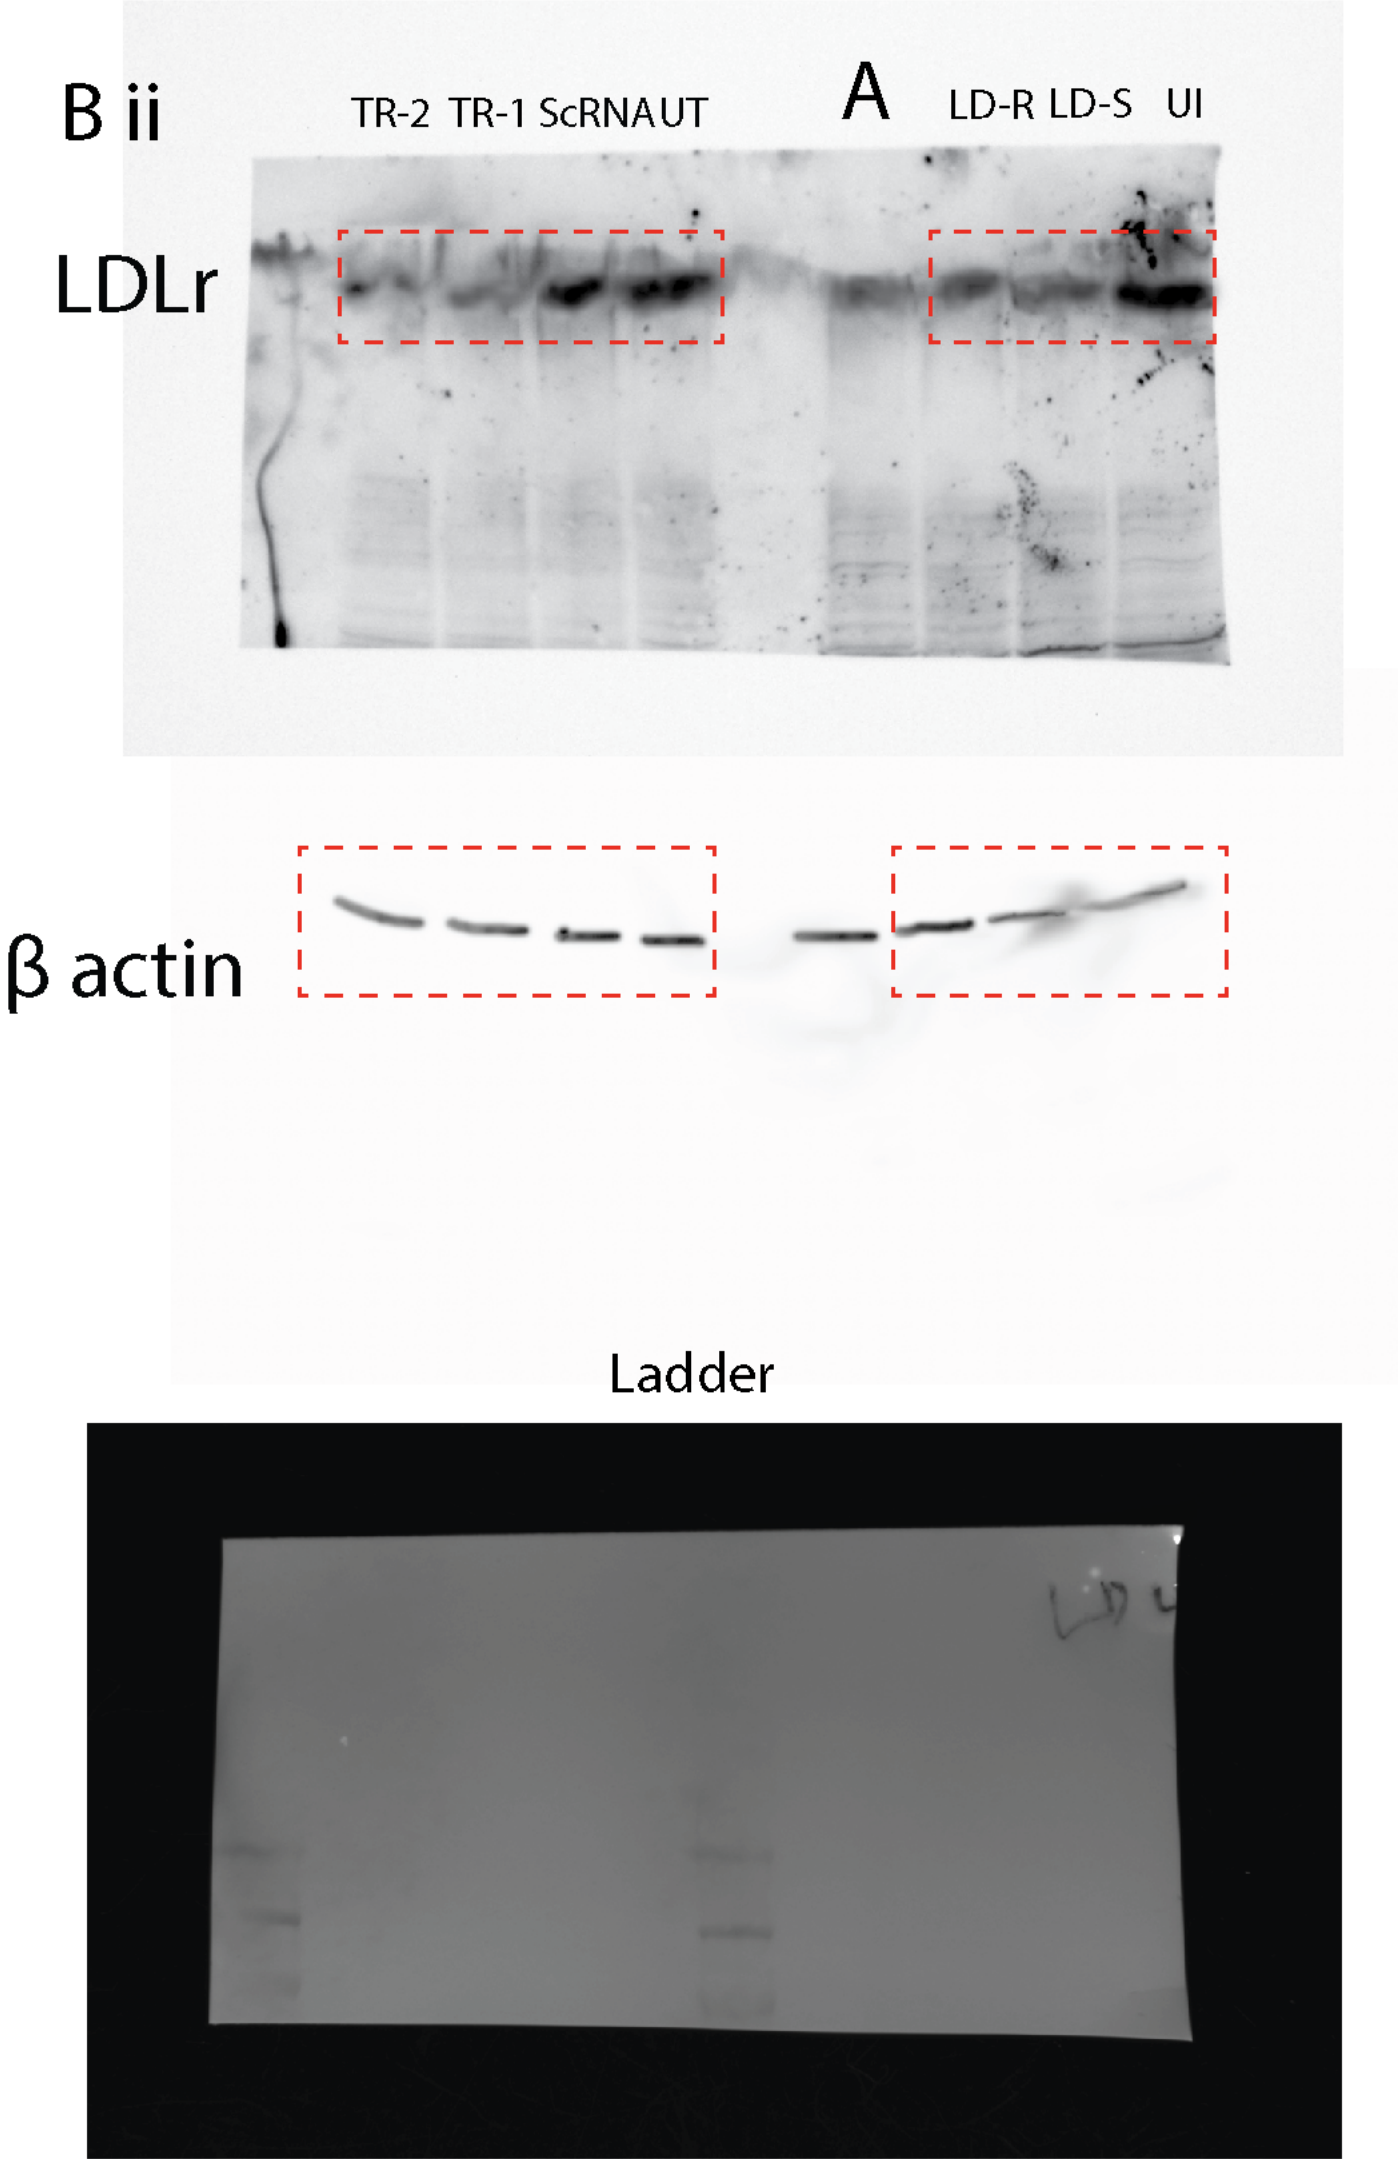

Supplement: fig4-figsupp1-data2 [file elife-102857-fig4-figsupp1-data2-v1.zip]

Ci

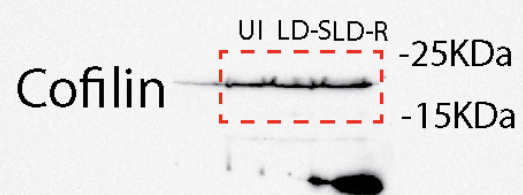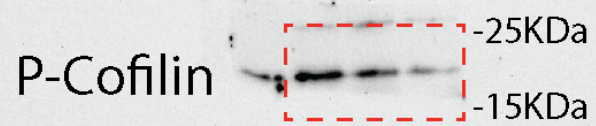

Ladder

-25KDa  
-15KDa

$\beta$ -Actin

-50KDa  
-37KDa

Supplement: fig4-figsupp1-data2 [file elife-102857-fig4-figsupp1-data2-v1.zip]

Figure 5

C

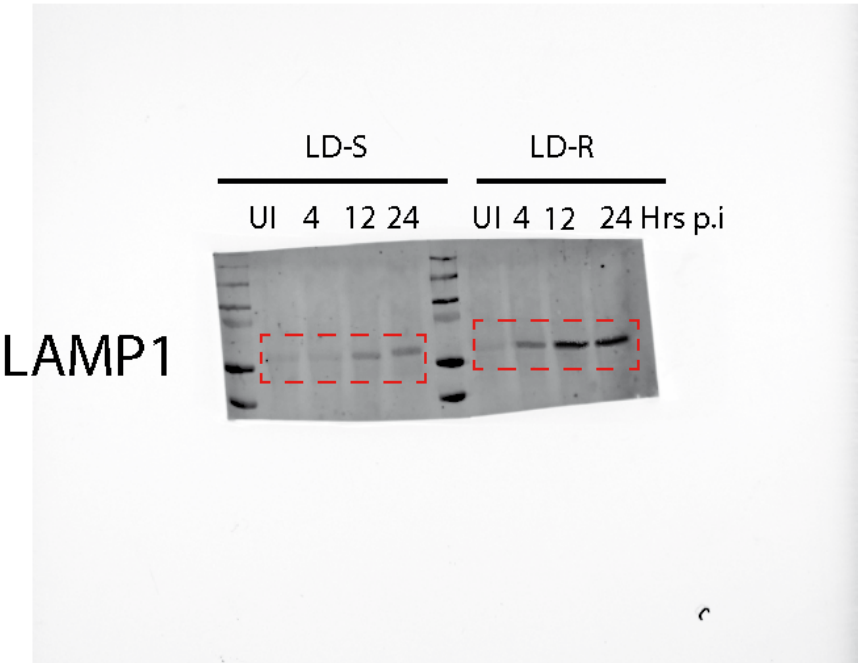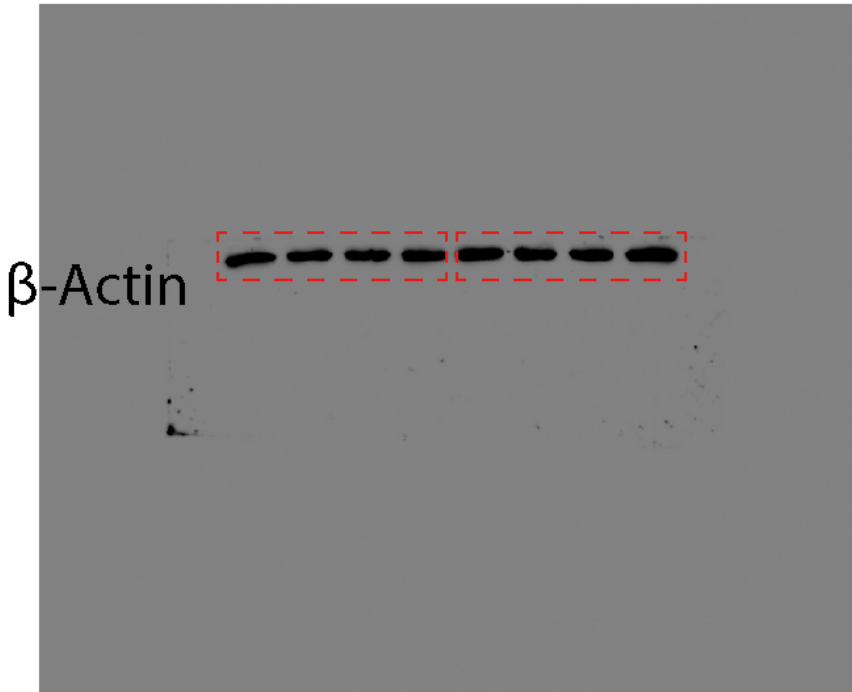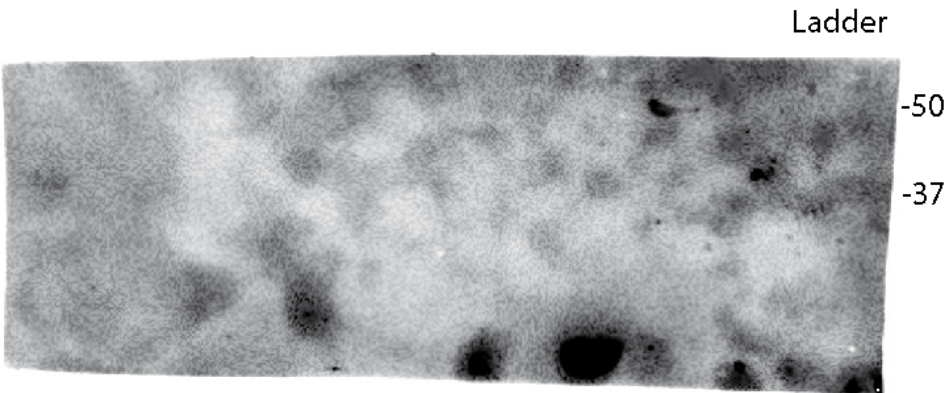

Supplement: fig5-data2 [file elife-102857-fig5-data2-v1.zip]

Figure 6

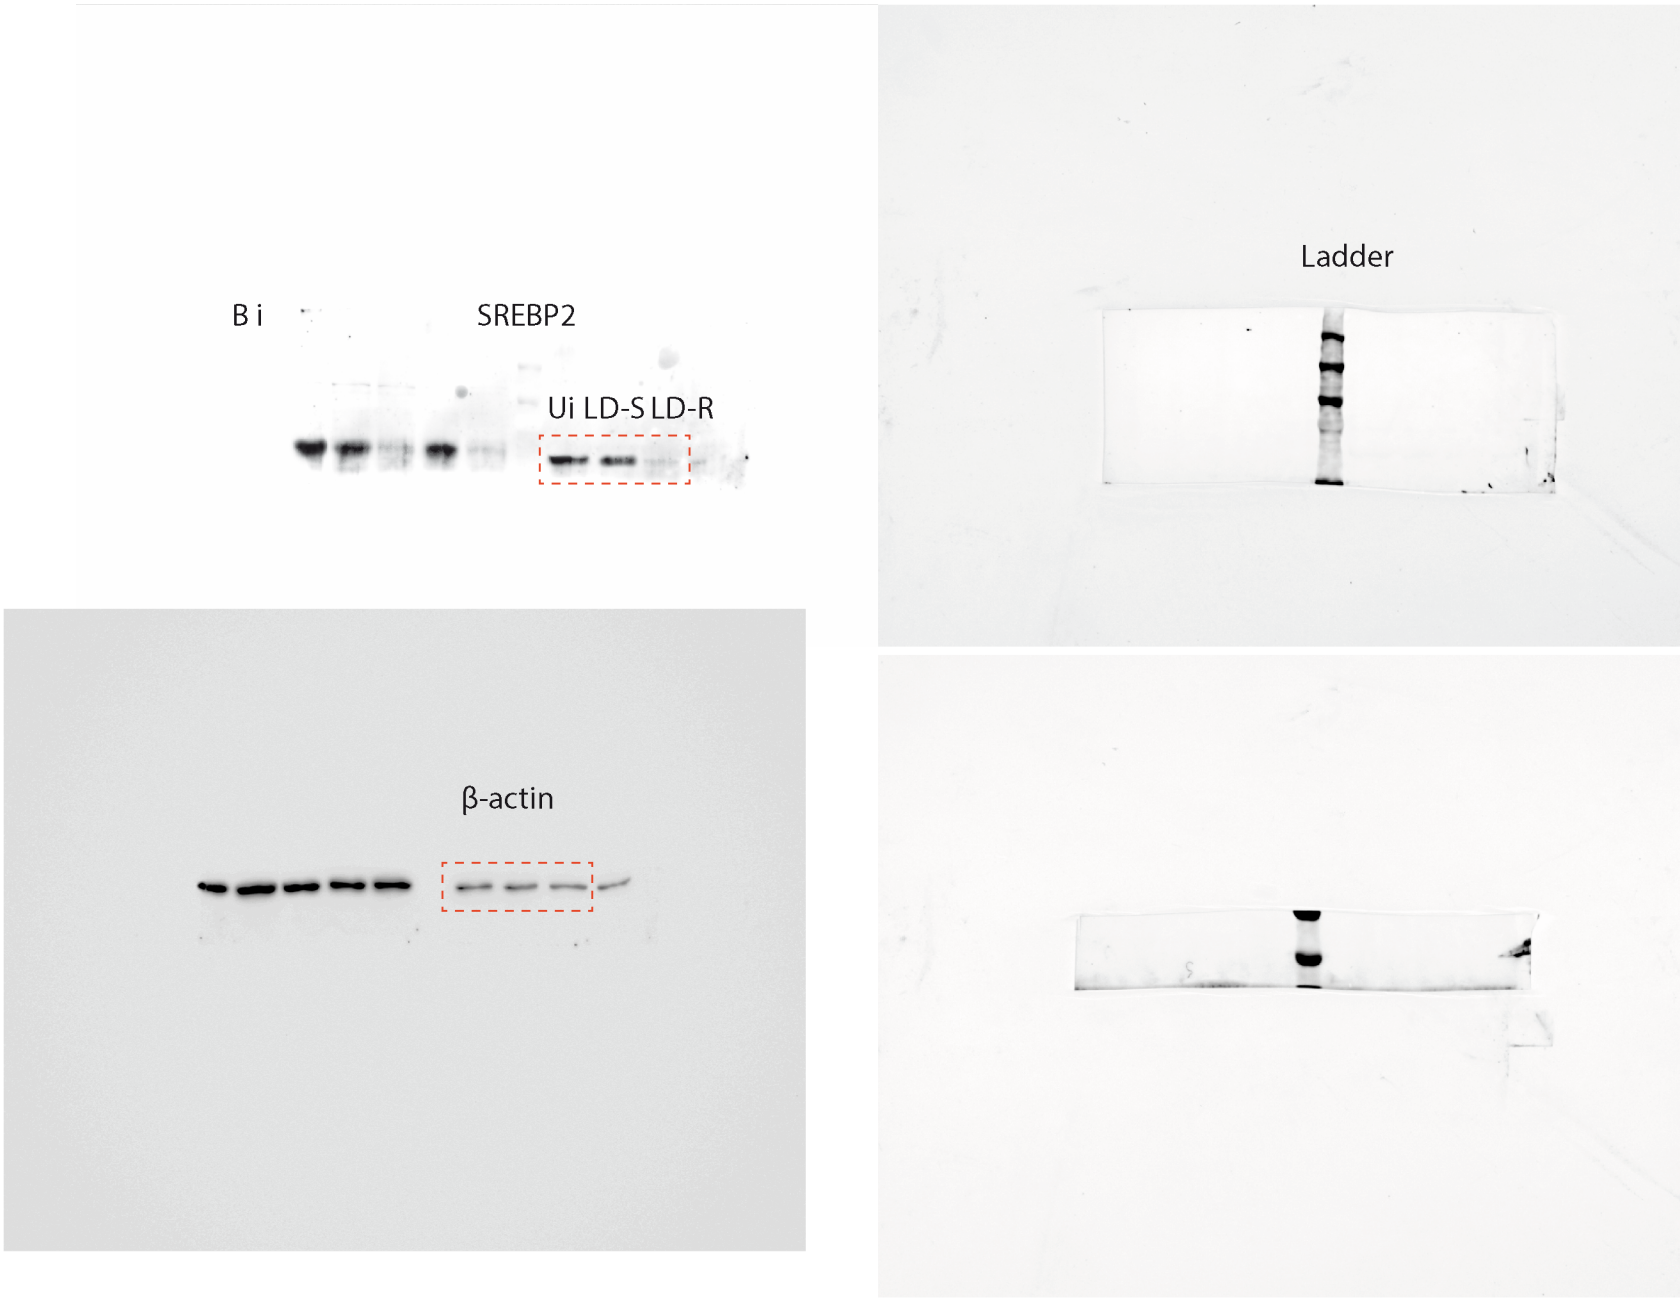

Supplement: fig6-data2 [file elife-102857-fig6-data2-v1.zip]

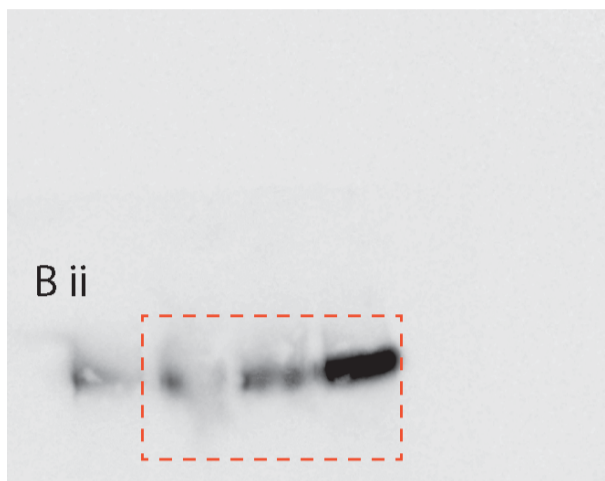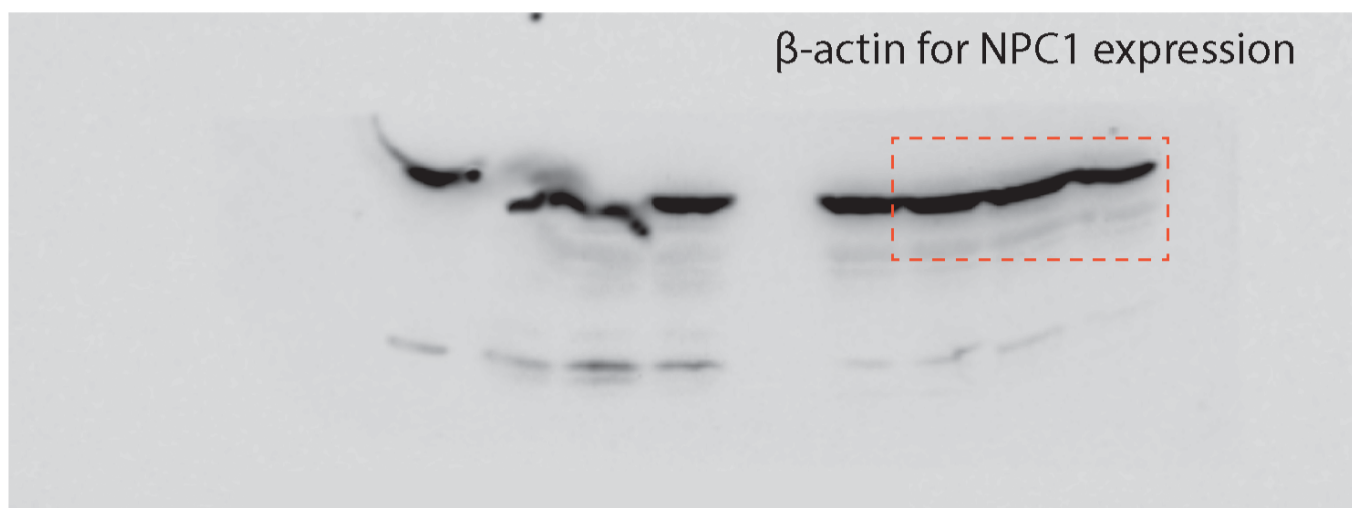

Supplement: fig6-data2 [file elife-102857-fig6-data2-v1.zip]

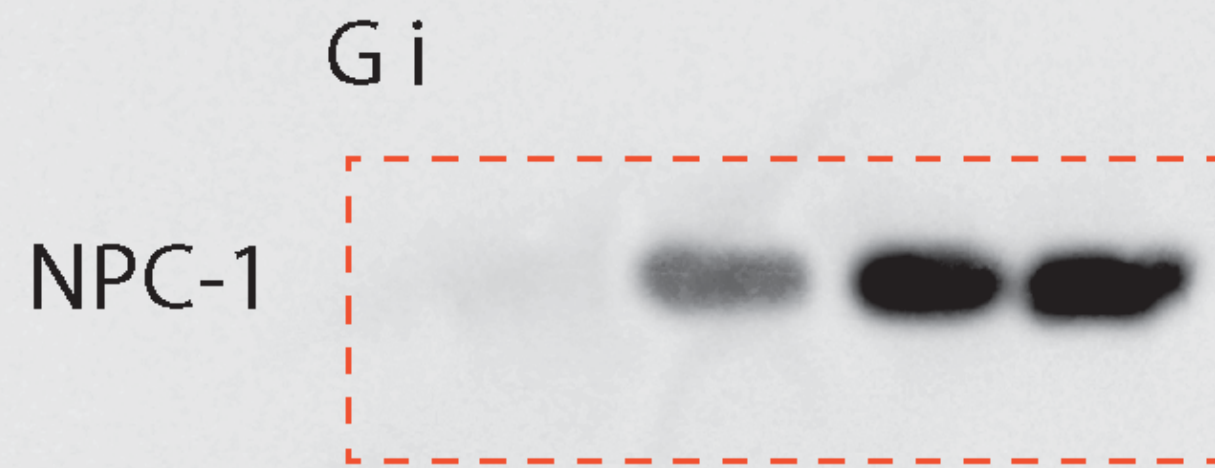

$\beta$ -actin for NPC1 knock down

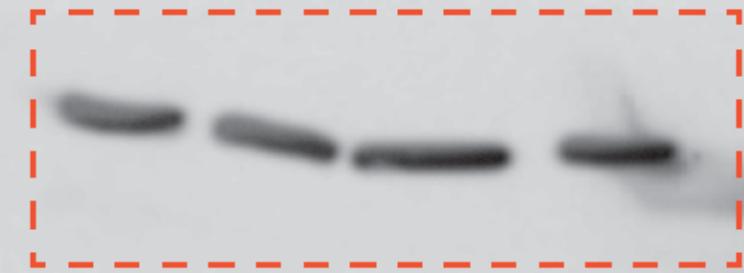

Supplement: fig6-data2 [file elife-102857-fig6-data2-v1.zip]

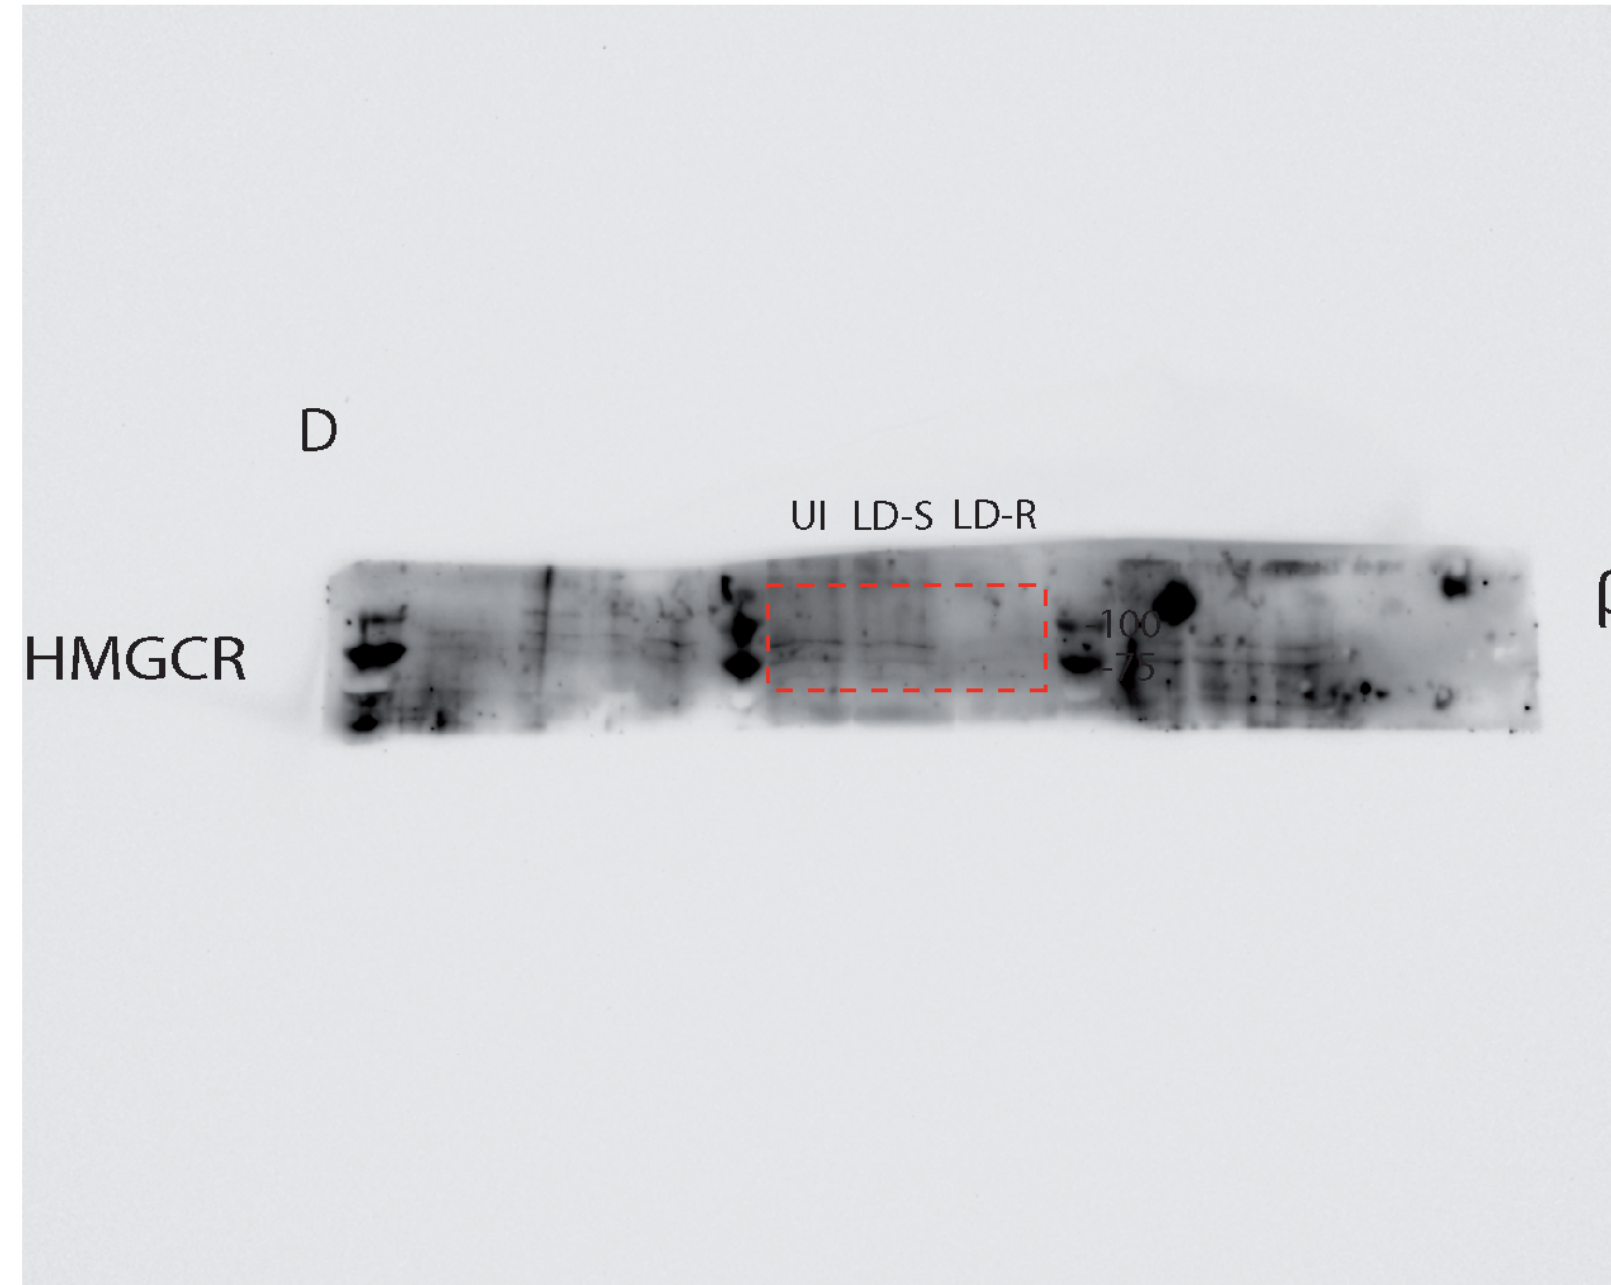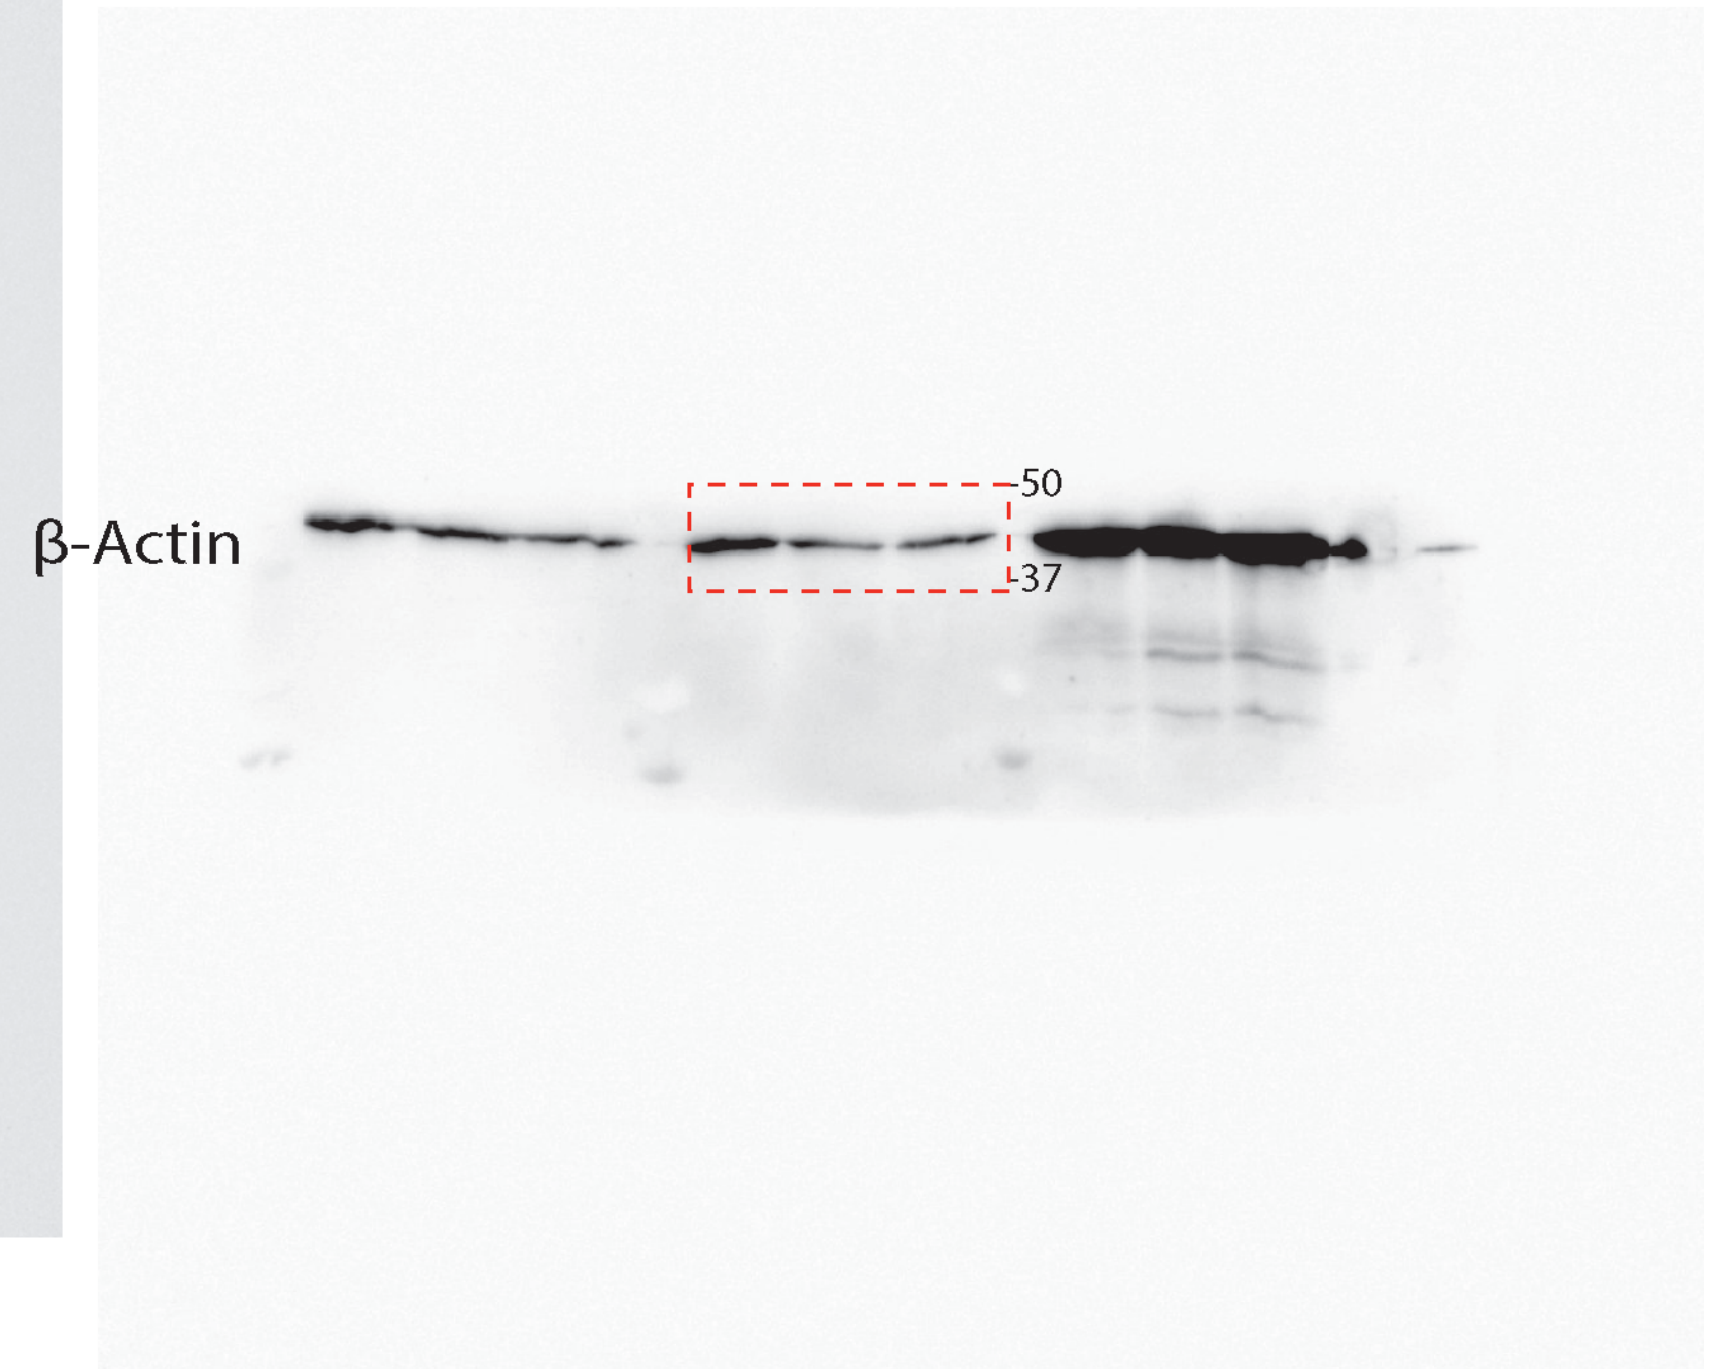

Supplement: fig6-data2 [file elife-102857-fig6-data2-v1.zip]

E

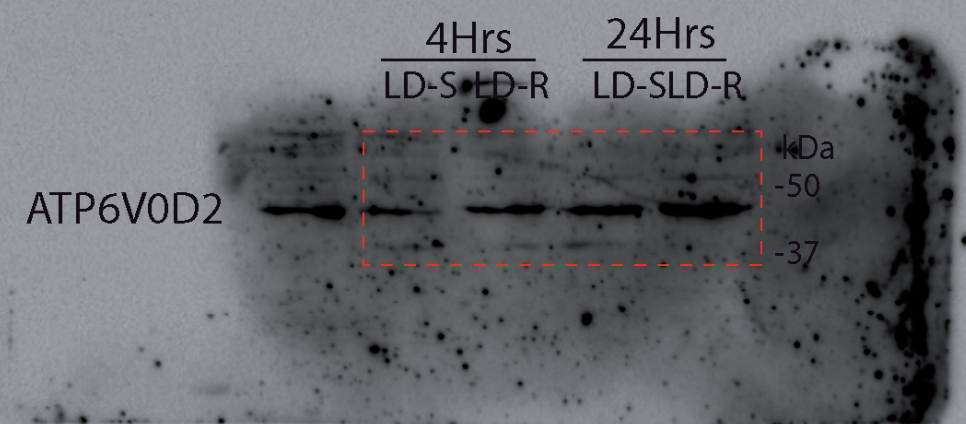

$\beta$ -actin

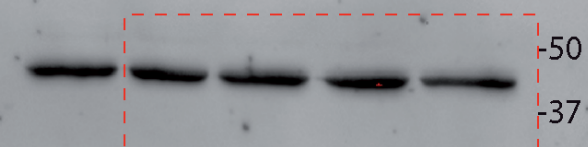

Supplement: fig7-data2 [file elife-102857-fig7-data2-v1.zip]

Figure 7

D ii

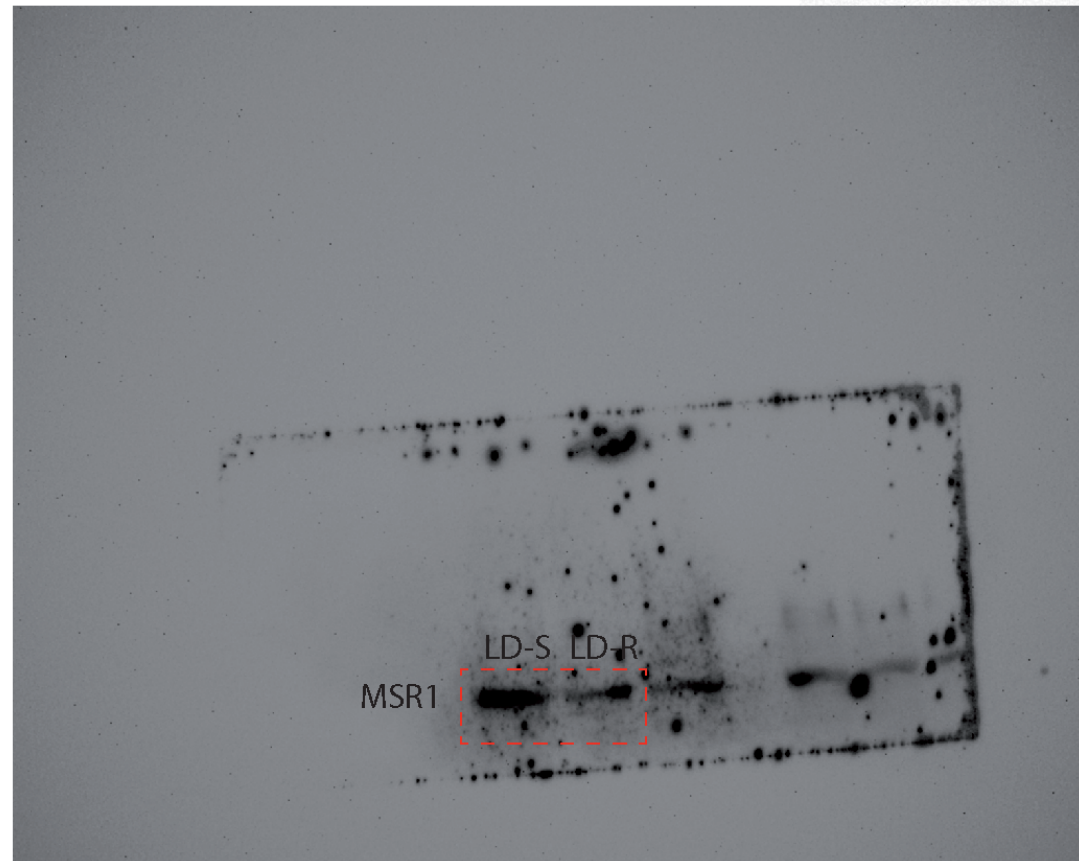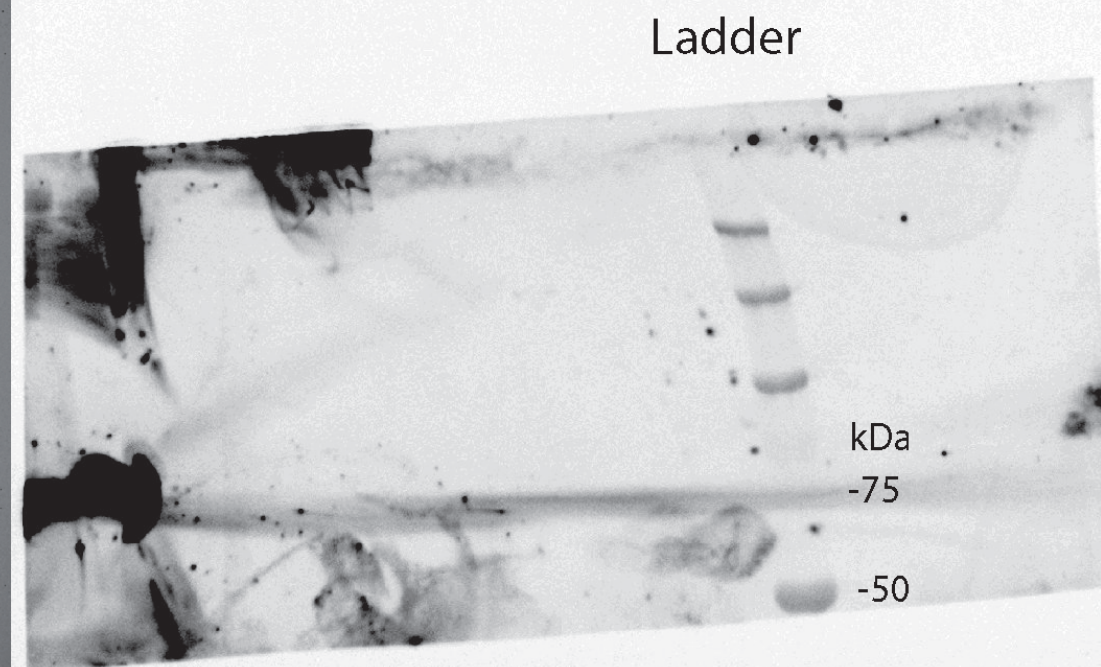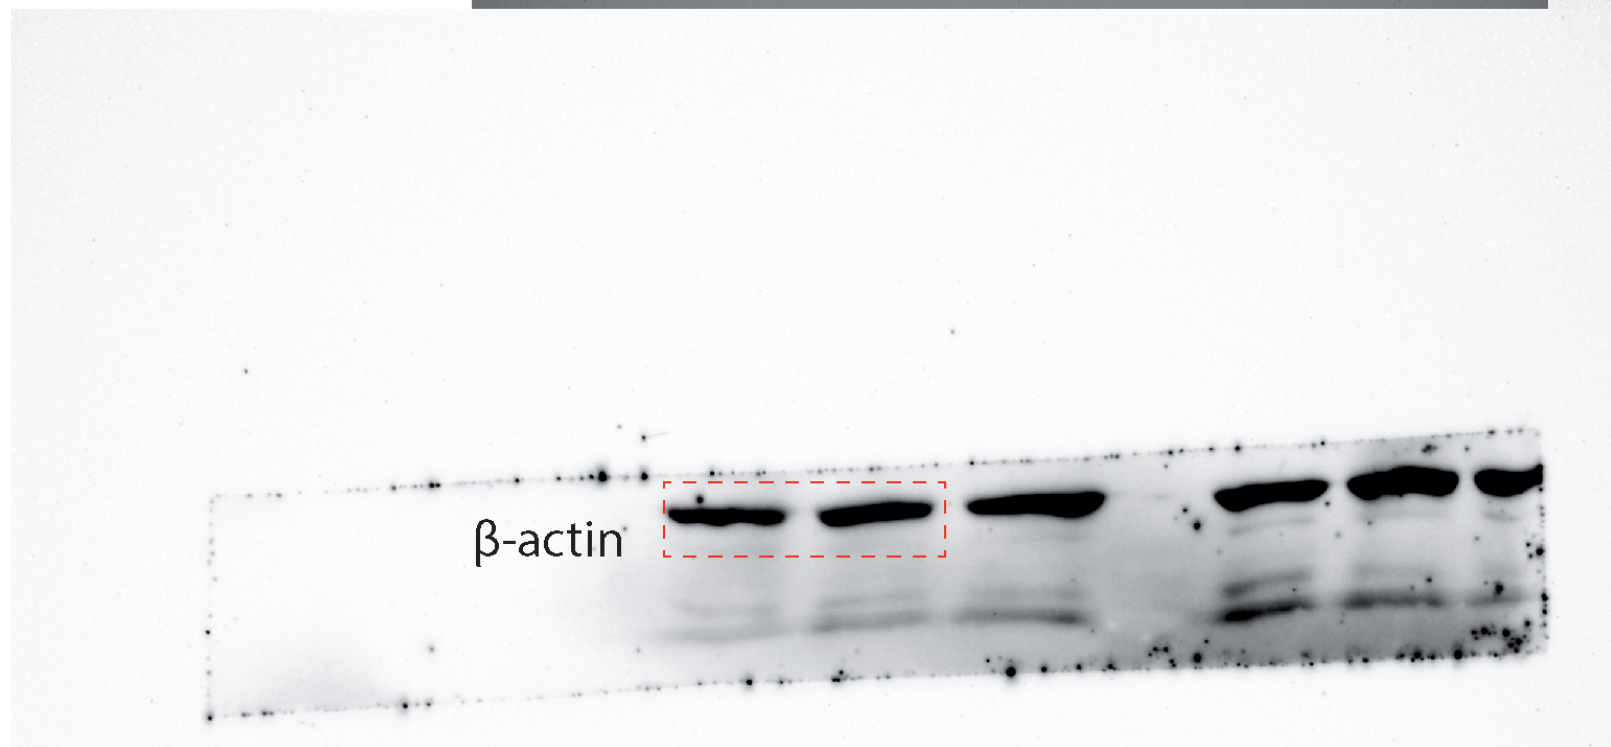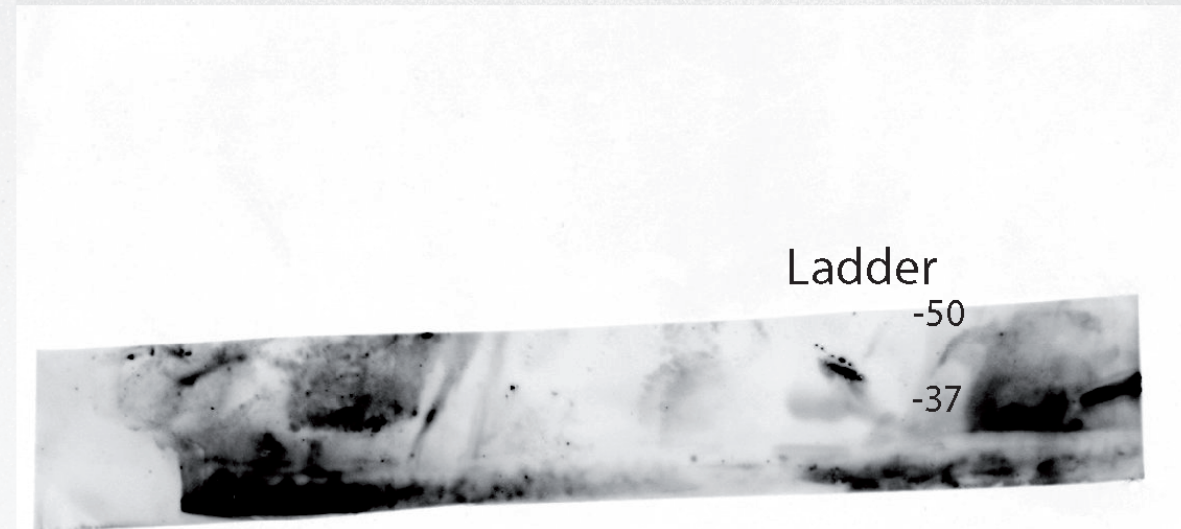

Supplement: fig7-data2 [file elife-102857-fig7-data2-v1.zip]
